# Supplementary material
Source: publisher figshare collection journal article supplement (https://acs.figshare.com/ndownloader/files/21560742)
Supplement: Supplementary file 1 [file 21560742]

## Supporting Information

# Understanding Thickness-Dependent Transport Kinetics in Nanosheet-Based Battery Electrodes

*Zhengyu Ju,<sup>†,⊥</sup> Yue Zhu,<sup>†,⊥</sup> Xiao Zhang,<sup>†,⊥</sup> Diana M. Lutz,<sup>‡</sup> Zhiwei Fang,<sup>†</sup> Kenneth J.*

*Takeuchi,<sup>‡,||</sup> Esther S. Takeuchi,<sup>‡,§,||</sup> Amy C. Marschilok<sup>‡,§,||</sup> and Guihua Yu<sup>\*,†</sup>*

<sup>†</sup> Materials Science and Engineering Program, Texas Materials Institute, The University of Texas at Austin, Austin, Texas 78712, United States.

<sup>‡</sup> Department of Chemistry, Stony Brook University, Stony Brook, New York 11794, United States.

<sup>§</sup> Energy Sciences Directorate, Brookhaven National Laboratory, Upton New York 11973, United States.

<sup>||</sup> Department of Materials Science and Chemical Engineering, Stony Brook University, Stony Brook, New York 11794, United States.

<sup>⊥</sup> These authors contributed equally to this work.

\*Correspondence: G.Y. (ghyu@austin.utexas.edu)

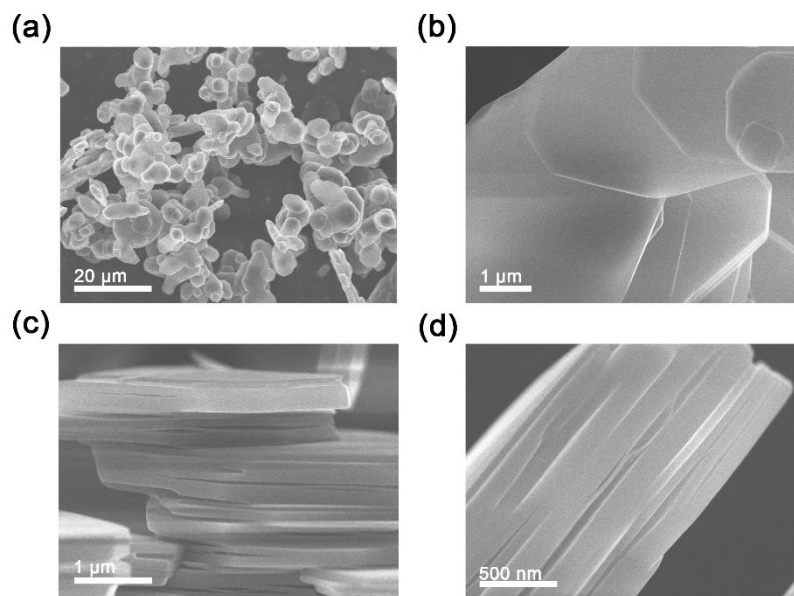

**Figure S1.** (a, b) Top view SEM images of bulk  $\text{VOPO}_4 \cdot 2\text{H}_2\text{O}$ . (c, d) Cross-section view SEM images of bulk  $\text{VOPO}_4 \cdot 2\text{H}_2\text{O}$ .

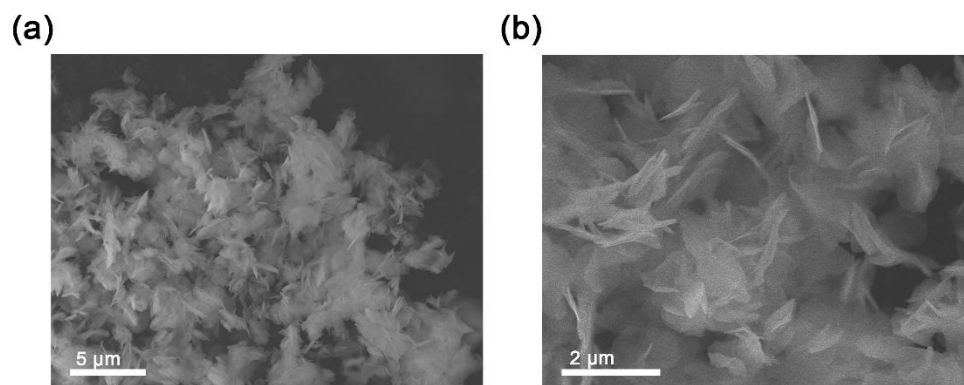

**Figure S2.** SEM images of exfoliated VOPO<sub>4</sub> nanosheets.

(a)

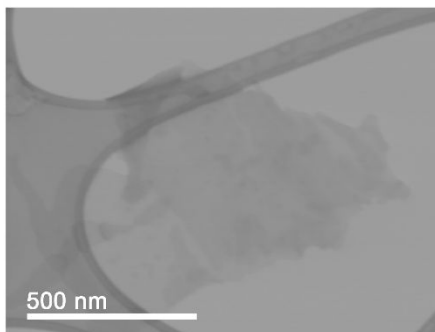

(b)

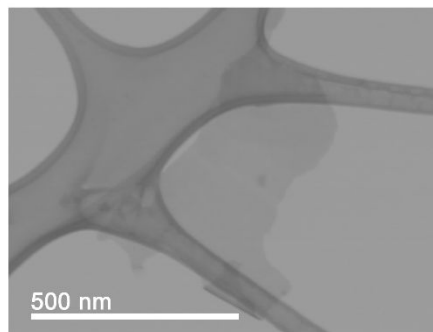

**Figure S3.** STEM images of exfoliated VOPO<sub>4</sub> nanosheets.

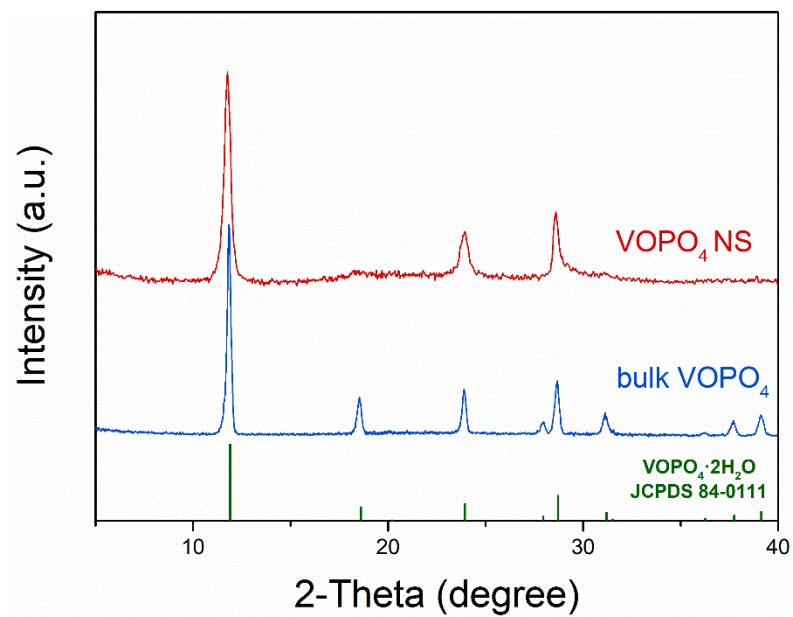

**Figure S4.** XRD patterns of bulk VOPO<sub>4</sub> (blue line) and exfoliated VOPO<sub>4</sub> nanosheets (red line).

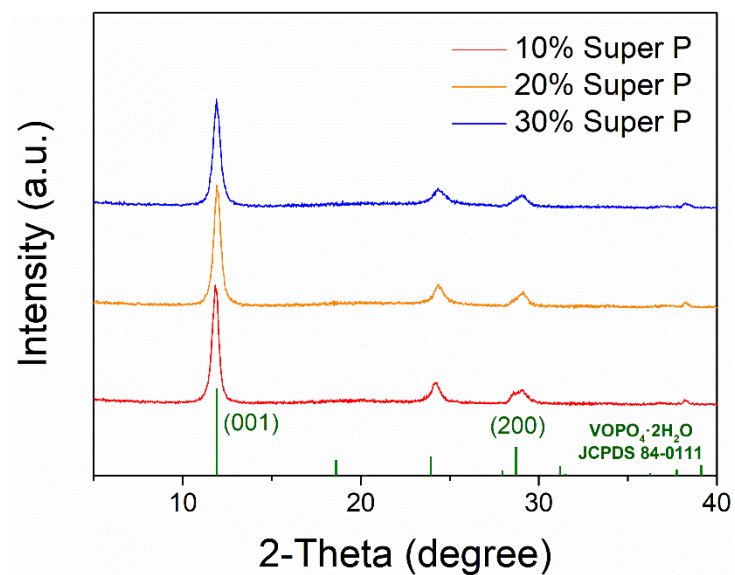

**Figure S5.** XRD patterns of drop-casted  $\text{VOPO}_4$  electrodes with different contents of Super P as conductive additive. (Red line: 10 wt.%, orange line: 20 wt.% and blue line: 30 wt.%)

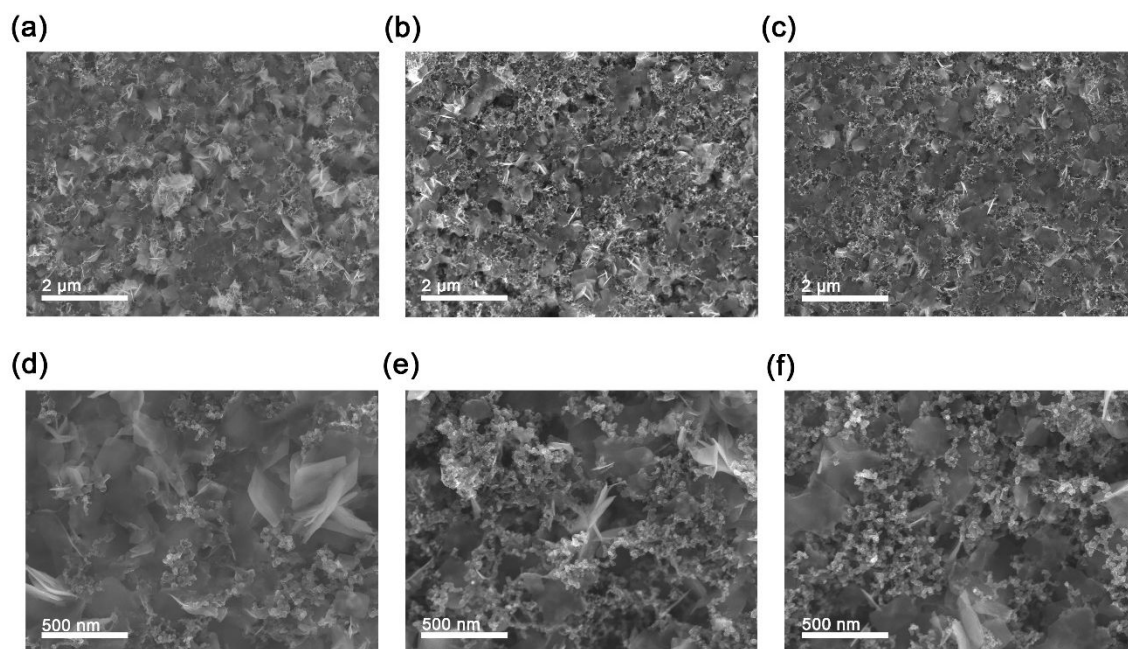

**Figure S6.** SEM images of drop-casted  $\text{VOPO}_4/\text{Super P}$  electrodes. (a, d) SEM images of electrodes with 10 wt.% Super P. (b, e) SEM images of electrodes with 20 wt.% Super P. (c, f) SEM images of electrodes with 30 wt.% Super P.

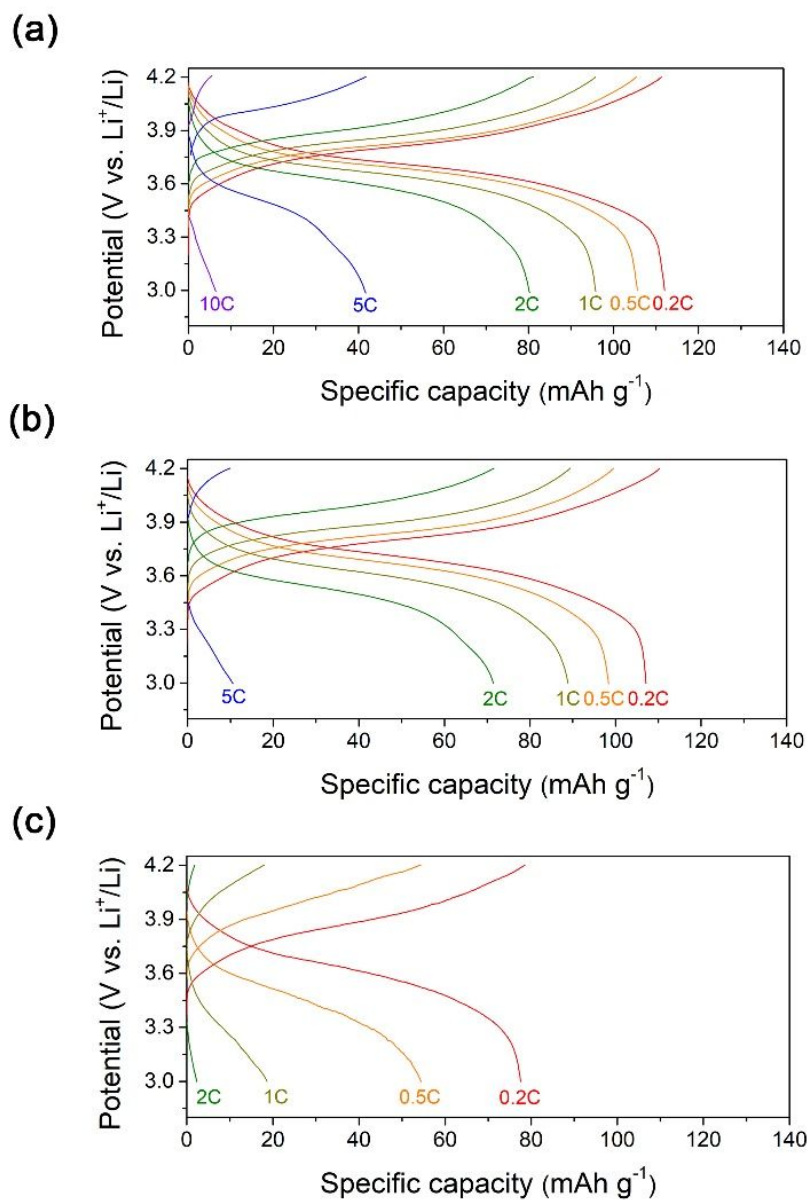

**Figure S7.** Galvanostatic charge-discharge curves of drop-casted  $\text{VOPO}_4$  electrodes with 10 wt.% Super P. Areal mass loading: (a)  $1 \text{ mg cm}^{-2}$ , (b)  $5 \text{ mg cm}^{-2}$  and (c)  $10 \text{ mg cm}^{-2}$ .



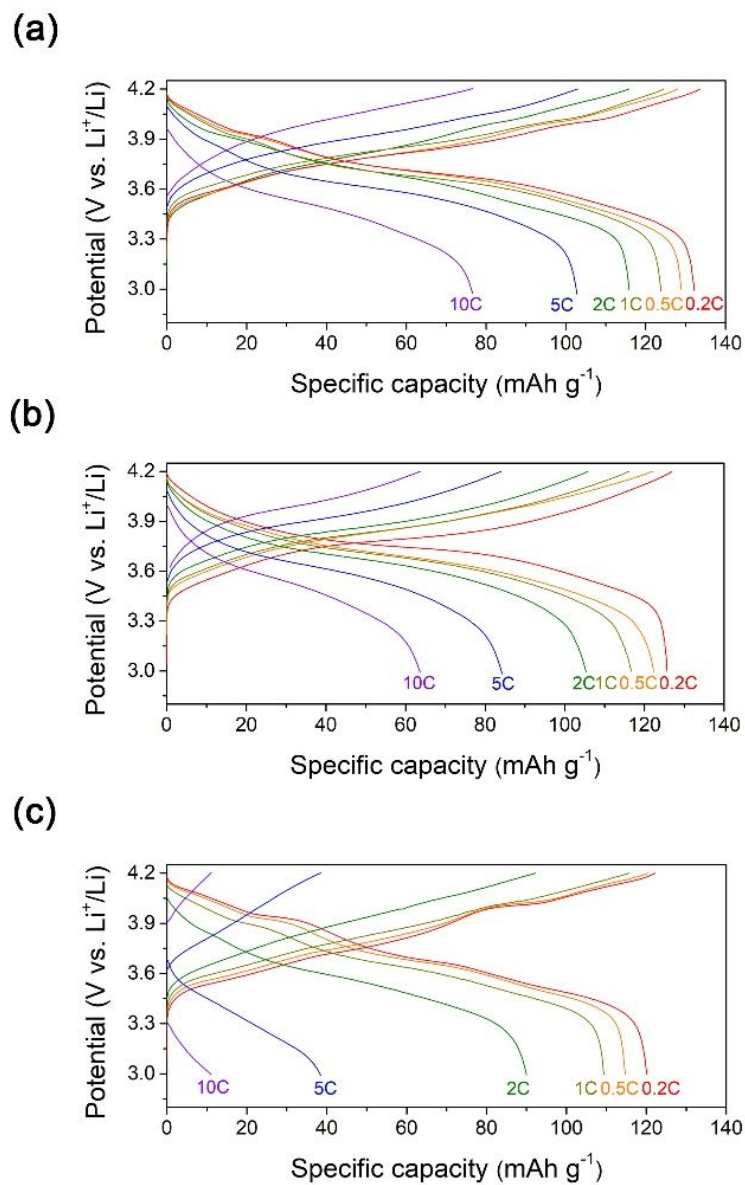

**Figure S8.** Galvanostatic charge-discharge curves of drop-casted  $\text{VOPO}_4$  electrodes with 20 wt.% Super P. Areal mass loading: (a)  $1 \text{ mg cm}^{-2}$ , (b)  $5 \text{ mg cm}^{-2}$  and (c)  $10 \text{ mg cm}^{-2}$ .

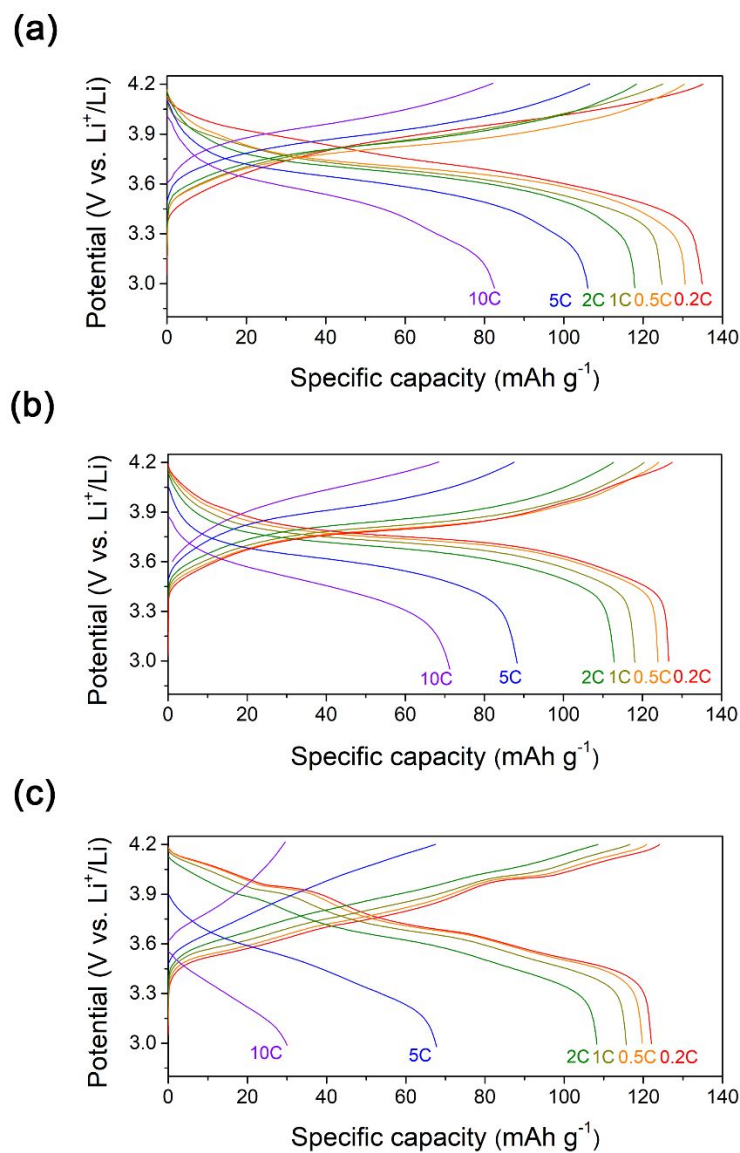

**Figure S9.** Galvanostatic charge-discharge curves of drop-casted  $\text{VOPO}_4$  electrodes with 30 wt.% Super P. Areal mass loading: (a)  $1 \text{ mg cm}^{-2}$ , (b)  $5 \text{ mg cm}^{-2}$  and (c)  $10 \text{ mg cm}^{-2}$ .

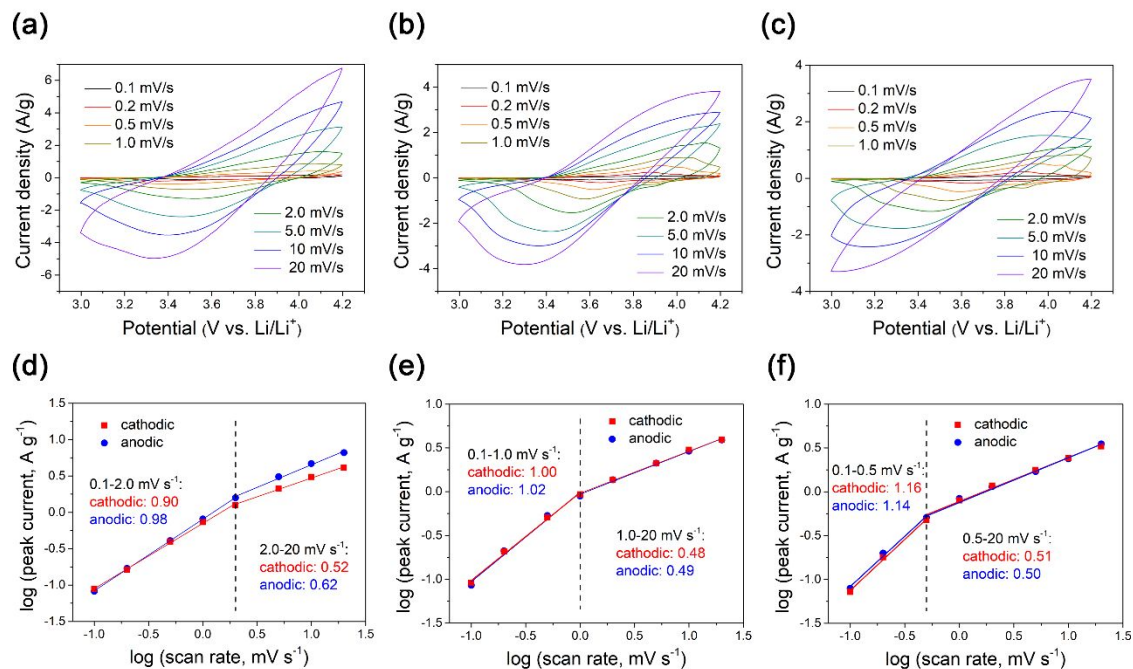

**Figure S10.** Cyclic voltammetric curves at various scan rates from 0.1 to 20 mV s<sup>-1</sup> and corresponding b value determination. Areal mass loading: (a, d) 1 mg cm<sup>-2</sup>, (b, e) 5 mg cm<sup>-2</sup> and (c, f) 10 mg cm<sup>-2</sup>.

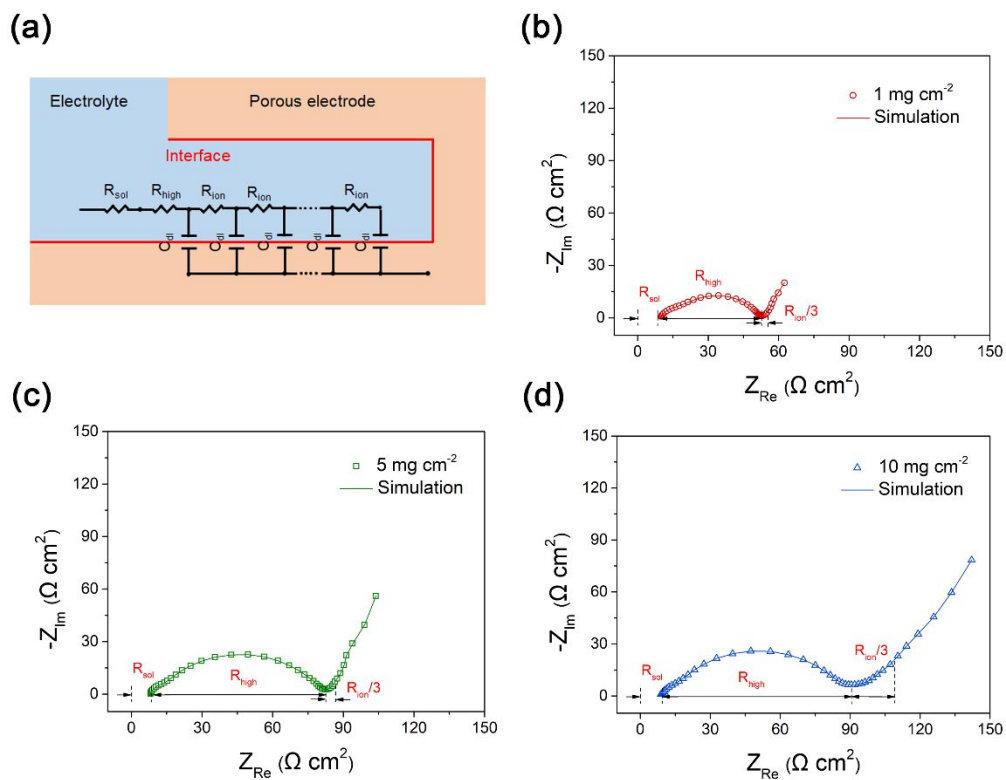

**Figure S11.** (a) Transmission line equivalent circuit of porous electrodes at 0% state of charge (SOC). Nyquist plots characterized by using a symmetric cell with two identical electrodes at 0% SOC. Areal mass loading: (b)  $1 \text{ mg cm}^{-2}$ , (c)  $5 \text{ mg cm}^{-2}$  and (d)  $10 \text{ mg cm}^{-2}$ .

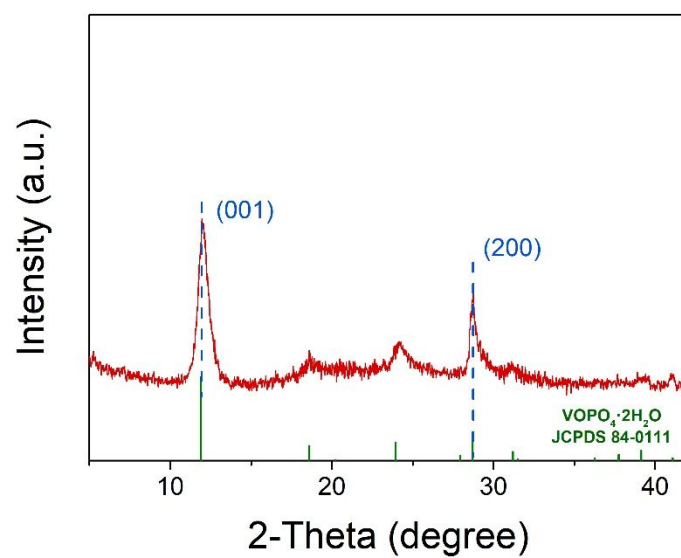

**Figure S12.** XRD pattern of an ice-templated  $\text{VOPO}_4$  electrode.

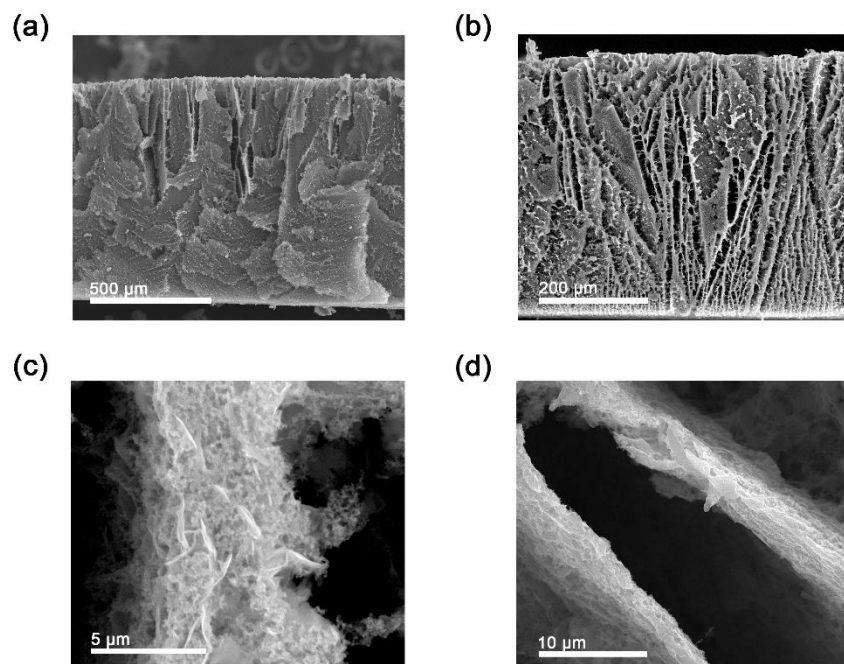

**Figure S13.** Cross-section SEM images of ice-templated VOPO<sub>4</sub> electrodes with areal mass loading: (a) 10 mg cm<sup>-2</sup> and (b) 5 mg cm<sup>-2</sup> and corresponding electrode thickness is approximate 800 μm and 400 μm, respectively. Zoom-in cross-section SEM image (c) and top-view image (d).

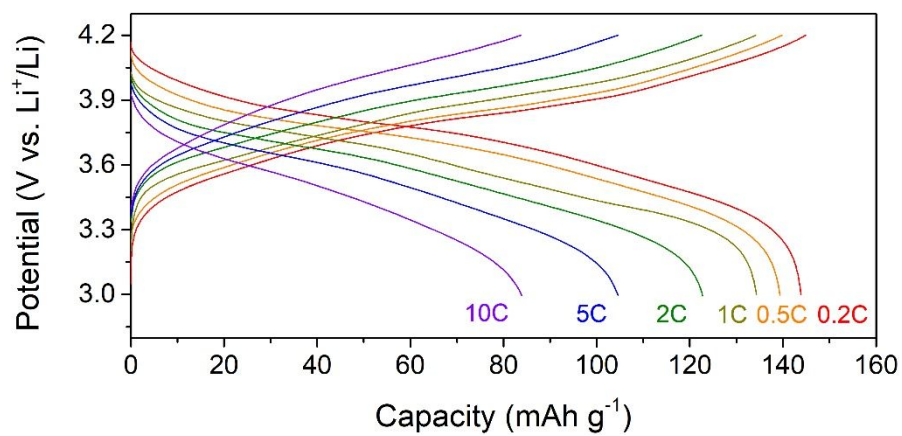

**Figure S14.** Galvanostatic charge-discharge curves of ice-templated VOPO<sub>4</sub> electrodes with areal mass loading: 10 mg cm<sup>-2</sup>.

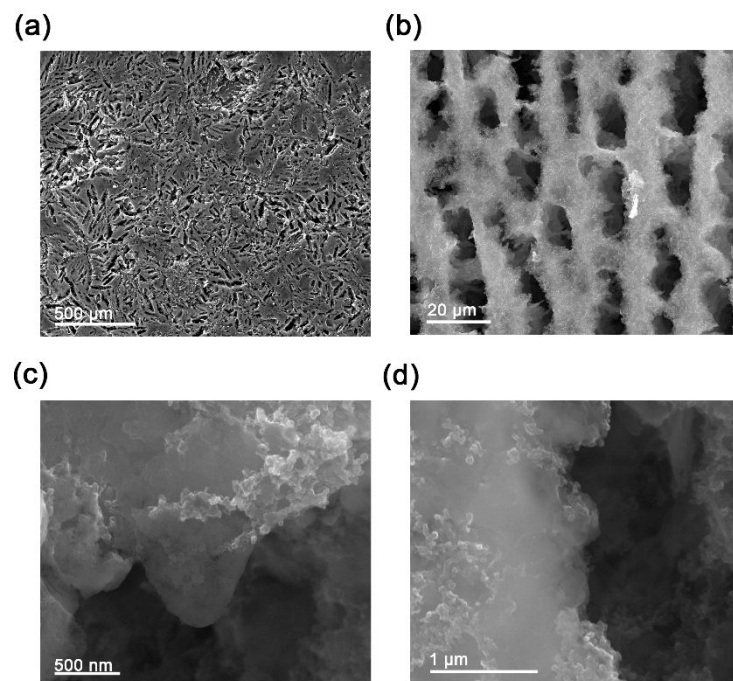

**Figure S15.** Morphologies of ice-templated VOPO<sub>4</sub> electrodes after cycling. (a, c) Top view SEM images and (b, d) cross-section view SEM images of the electrodes.



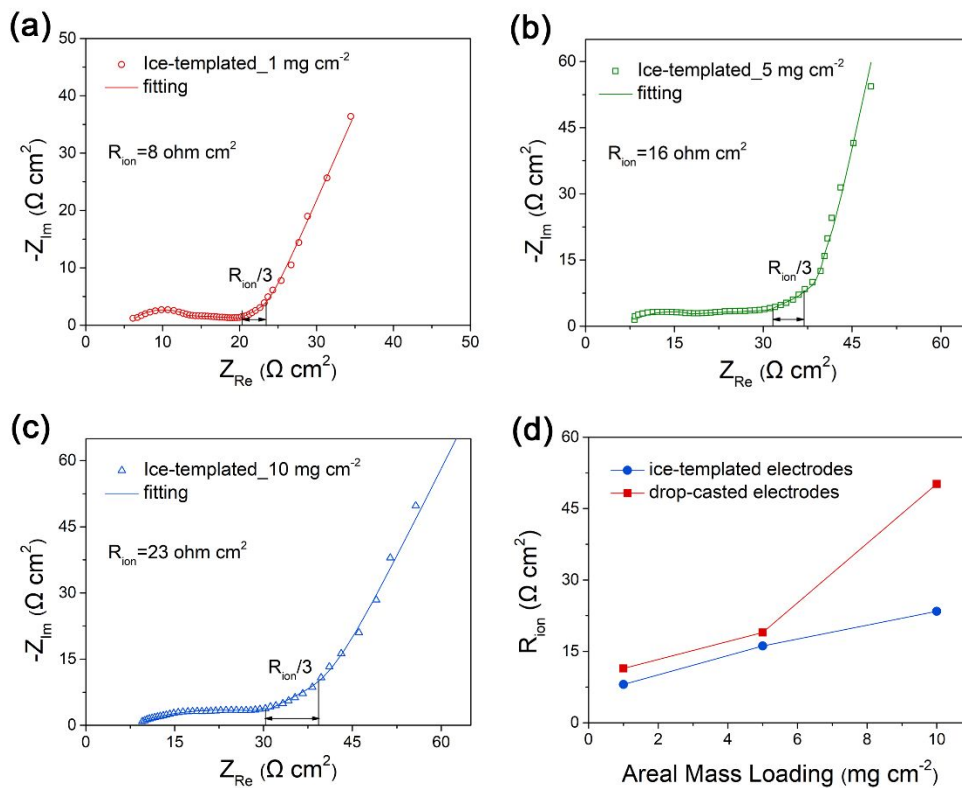

**Figure S16.** Simulated Nyquist plots of ice-templated electrodes characterized by using a symmetric cell with two identical electrodes at 0% SOC. Areal mass loading: (a)  $1 \text{ mg cm}^{-2}$ , (b)  $5 \text{ mg cm}^{-2}$  and (c)  $10 \text{ mg cm}^{-2}$ . (d)  $R_{ion}$  comparison between ice-templated and drop-casted electrodes with various areal mass loadings.

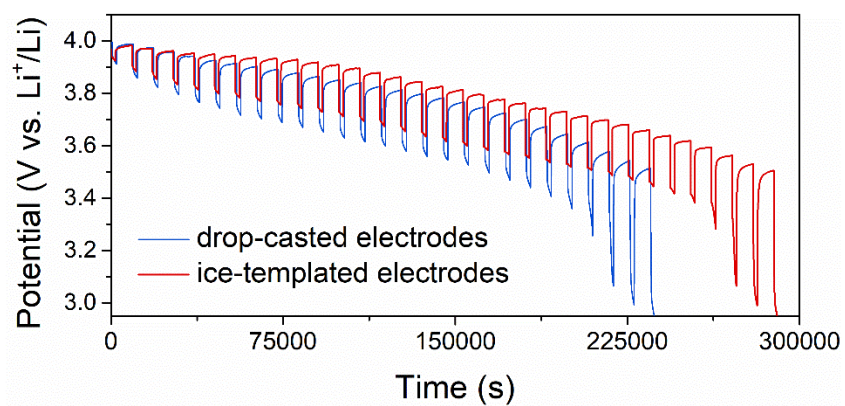

**Figure S17.** Voltage curves (1<sup>st</sup> discharge) for GITT cycles of drop-casted and ice-templated electrodes. Areal mass loading of drop-casted and ice-templated electrodes: 10 mg cm<sup>-2</sup>.

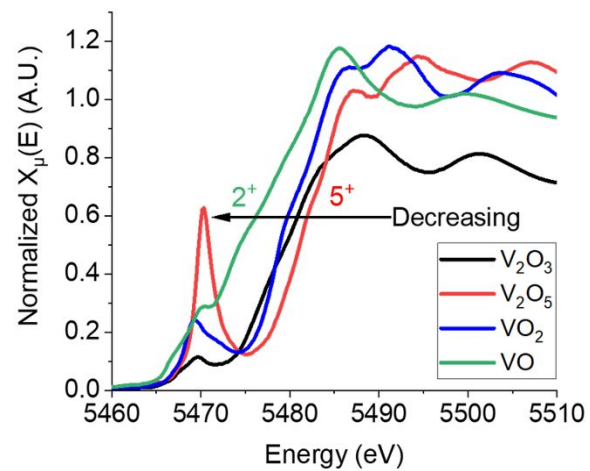

**Figure S18.** XANES spectra for the vanadium  $5^+$ ,  $4^+$ ,  $3^+$ , and  $2^+$  reference materials.

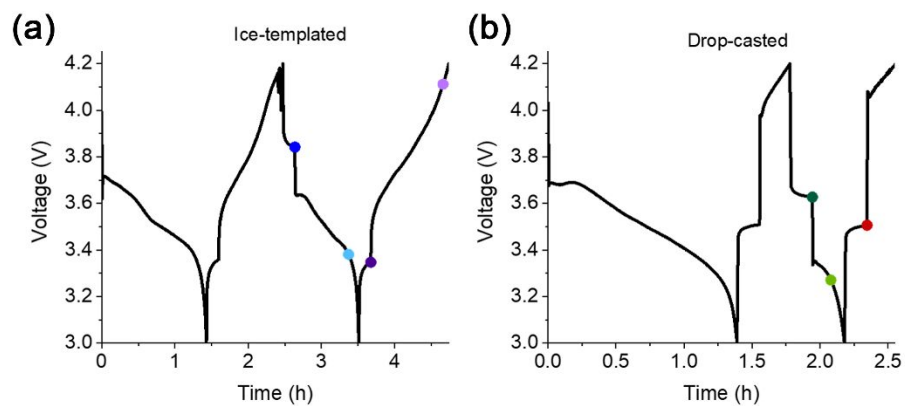

**Figure S19.** First and second discharge and charge voltage profiles as a function of time for in situ cells prepared using the (a) ice-templated and (b) drop-casted electrodes. Areal mass loading of drop-casted and ice-templated electrodes:  $10 \text{ mg cm}^{-2}$ .

**Table S1. Charge-transfer resistance determined for  
half-cells with various mass loadings.**

| <b>Areal mass loading (mg cm<sup>-2</sup>)</b> | <b>R<sub>ct</sub> (Ω)</b> | <b>R<sub>ct,A</sub> (Ω cm<sup>2</sup>)</b> |
|------------------------------------------------|---------------------------|--------------------------------------------|
| <b>1</b>                                       | 1589                      | 8.98                                       |
| <b>5</b>                                       | 1246                      | 35.2                                       |
| <b>10</b>                                      | 1067                      | 60.3                                       |
